# Supplementary material
Source: HighWire-hosted journal article supplement (https://bmjopen.bmj.com/content/12/3/e052115)
Supplement: inline-supplementary-material-1 [file inline-supplementary-material-1.pdf]

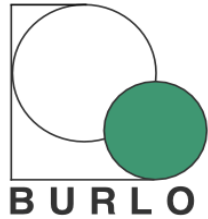

**INDAGINE SUGLI STANDARD OMS PER IL  
MIGLIORAMENTO DELLA QUALITÀ DELLE CURE  
PEDIATRICHE**

**Il punto di vista  
dell'operatore  
sanitario**

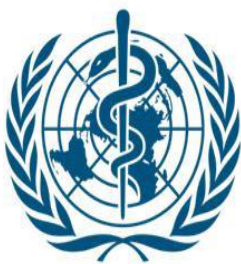

**WHO Collaborating Center  
for Maternal and Child Health  
Trieste Italy**

**Perché quest'indagine?**

Il presente questionario (*"Il punto di vista dell'operatore sanitario"*) è distribuito a tutti gli operatori coinvolti nell'assistenza del bambino, in parallelo ad un secondo questionario distribuito ai genitori, nell'ambito di un progetto multicentrico ed internazionale coinvolgente altri ospedali in Italia e in Brasile. I questionari raccolgono informazioni principalmente su degli standard proposti dall'Organizzazione Mondiale della Sanità (OMS) per migliorare la qualità delle cure pediatriche in ospedale.

**Perché partecipare?**

Le informazioni raccolte saranno utilizzate per capire meglio il punto di vista degli operatori sanitari e dell'utenza e per raccogliere eventuali proposte su come migliorare la qualità delle cure erogate. La incoraggiamo fortemente a partecipare ed a scrivere quello che pensa, perché questa è un'occasione importante per fare la differenza.

**Questo questionario permette di dar voce alle sue idee.**

**Il questionario è anonimo?**

In questo questionario non chiediamo il suo nome né altre informazioni che possano svelare la sua identità. Quindi si senta libero di rispondere quello che pensa veramente.

**Per noi è importante la sua vera opinione.**

**Grazie per il tempo che ci dedica,  
Le auguriamo una buona giornata!**

Lei in che reparto lavora?\*

- Clinica Pediatrica
- Pronto Soccorso
- Entrambi

\*Se presta servizio in entrambi, risponda alle seguenti domande in base al reparto dove lavora di più.

### SEZIONE A. RISORSE FISICHE PER GLI OPERATORI SANITARI

Rispetto al **triage del bambino**, la struttura in cui Lei lavora dispone di:

|                                                                                                         | Si | No, necessita qualche miglioramento | No, necessita un miglioramento drastico |
|---------------------------------------------------------------------------------------------------------|----|-------------------------------------|-----------------------------------------|
| 1. Protocolli clinici per il triage completi e chiari                                                   |    |                                     |                                         |
| 2. Una politica chiara che definisce il tempo massimo di attesa per il di triage e per la visita medica |    |                                     |                                         |
| 3. Un sistema di triage attivo 24/24h                                                                   |    |                                     |                                         |

Rispetto **alle emergenze pediatriche**, la struttura in cui Lei lavora dispone di:

|                                                                                                                                                                                                                              | Si | No, necessita qualche miglioramento | No, necessita un miglioramento drastico |
|------------------------------------------------------------------------------------------------------------------------------------------------------------------------------------------------------------------------------|----|-------------------------------------|-----------------------------------------|
| 4. Protocolli clinici per le emergenze completi e chiari                                                                                                                                                                     |    |                                     |                                         |
| 5. Strutture fisiche adeguate per la gestione dell'emergenza pediatrica (box o stanza con sufficiente spazio, illuminazione, mobilio, prese elettriche, prese per ossigeno, senza barriere che ostacolano in lavoro in team) |    |                                     |                                         |
| 6. Algoritmi relativi al trattamento delle emergenze pediatriche visibili alle pareti completi e chiari                                                                                                                      |    |                                     |                                         |
| 7. Carrello per la rianimazione sempre adeguatamente fornito con tutto l'equipaggiamento funzionante per la rianimazione e le cure pediatriche di emergenza, disponibile in ogni momento                                     |    |                                     |                                         |
| 8. Costante disponibilità di farmaci per le emergenze pediatriche                                                                                                                                                            |    |                                     |                                         |

Rispetto al bambino con **sintomi respiratori acuti**, la struttura in cui Lei lavora dispone di:

|                                                                                                                                                                                                          | Si | No, necessita qualche miglioramento | No, necessita un miglioramento drastico |
|----------------------------------------------------------------------------------------------------------------------------------------------------------------------------------------------------------|----|-------------------------------------|-----------------------------------------|
| 9. Protocolli clinici scritti basati sull'evidenza completi e chiari                                                                                                                                     |    |                                     |                                         |
| 10. Costante disponibilità di risultati emogas (anche da capillare) di emocromo, PCR, procalcitonina, elettroliti in 1 ora                                                                               |    |                                     |                                         |
| 11. Costante disponibilità di antibiotici e di broncodilatatori per trattare queste condizioni                                                                                                           |    |                                     |                                         |
| 12. Costante disponibilità di ossigeno                                                                                                                                                                   |    |                                     |                                         |
| 13. Costante disponibilità di equipaggiamento per la somministrazione di ossigeno (naso-cannule, mascherine...) e di apparecchi per la somministrazione di farmaci nebulizzati (aerosol o distanziatori) |    |                                     |                                         |

Rispetto al bambino con **diarrea**, la struttura in cui Lei lavora dispone di:

|                                                                                                                | Si | No, necessita qualche miglioramento | No, necessita un miglioramento drastico |
|----------------------------------------------------------------------------------------------------------------|----|-------------------------------------|-----------------------------------------|
| 14. Protocolli clinici completi e chiari                                                                       |    |                                     |                                         |
| 15. Algoritmi per la reidratazione visibili sulle pareti                                                       |    |                                     |                                         |
| 16. Criteri chiari per l'ospedalizzazione                                                                      |    |                                     |                                         |
| 17. Costante disponibilità di soluzioni reidratanti orali e per somministrazione endovenosa sempre disponibili |    |                                     |                                         |

Rispetto al bambino con **febbre**, la struttura in cui Lei lavora fornisce:

|                                                                     | Si | No, necessita qualche miglioramento | No, necessita un miglioramento drastico |
|---------------------------------------------------------------------|----|-------------------------------------|-----------------------------------------|
| 18. Protocolli clinici completi e chiari                            |    |                                     |                                         |
| 19. Disponibilità di un microscopio per esame urine ed esame liquor |    |                                     |                                         |
| 20. Costante disponibilità di emocultura con risultato in 2 giorni  |    |                                     |                                         |

Rispetto al **bambino con dolore**, la struttura in cui Lei lavora dispone di:

|                                                                                                                                                 | Si | No, necessita qualche miglioramento | No, necessita un miglioramento drastico |
|-------------------------------------------------------------------------------------------------------------------------------------------------|----|-------------------------------------|-----------------------------------------|
| 21. Protocolli aggiornati per il riconoscimento, la valutazione e la gestione del dolore completi e chiari                                      |    |                                     |                                         |
| 22. Costante disponibilità di farmaci adeguati per il trattamento del dolore nei bambini (paracetamolo, ibuprofene, fentanyl nasale/morfina ev) |    |                                     |                                         |
| 23. Procedure standardizzate per la gestione del dolore nei bambini di tipo non farmacologico (es. allattamento al seno, soluzione glucosata)   |    |                                     |                                         |

Rispetto al **bambino maltrattato**, la struttura in cui Lei lavora dispone di:

|                                                                                                                                    | Si | No, necessita qualche miglioramento | No, necessita un miglioramento drastico |
|------------------------------------------------------------------------------------------------------------------------------------|----|-------------------------------------|-----------------------------------------|
| 24. Protocolli aggiornati per l'individuazione, la documentazione e l'assistenza dei bambini vittime di violenza completi e chiari |    |                                     |                                         |
| 25. Team multidisciplinare per indagare, curare e fornire il supporto necessario ai bambini                                        |    |                                     |                                         |

Rispetto al **bambino che necessita di essere trasferito**, la struttura in cui Lei lavora dispone di

|                                                                                                                                                                                                   | Si | No, necessita qualche miglioramento | No, necessita un miglioramento drastico |
|---------------------------------------------------------------------------------------------------------------------------------------------------------------------------------------------------|----|-------------------------------------|-----------------------------------------|
| 26. Protocolli aggiornati per l'individuazione dei casi da trasferire                                                                                                                             |    |                                     |                                         |
| 27. Procedure chiare che garantiscano il tempestivo trasferimento in caso di necessità e cure adeguate durante il percorso                                                                        |    |                                     |                                         |
| 28. Un sistema di revisione dei casi trasferiti (es. discussioni cliniche periodiche), che favorisca la continuità delle cure ed il lavoro in team tra professionisti di diversi reparti/ospedali |    |                                     |                                         |

Rispetto alla **prevenzione infezioni ospedaliere**, la struttura in cui Lei lavora dispone di:

|                                                                                                                                                          | Si | No, necessita qualche miglioramento | No, necessita un miglioramento drastico |
|----------------------------------------------------------------------------------------------------------------------------------------------------------|----|-------------------------------------|-----------------------------------------|
| 29. Linee guida/protocolli chiari ed esaustivi in merito all'igiene delle mani ed alla prevenzione infezioni durante le procedure                        |    |                                     |                                         |
| 30. Stazioni per il lavaggio delle mani con acqua e sapone o soluzioni alcoliche in numero sufficiente                                                   |    |                                     |                                         |
| 31. Costante disponibilità di soluzioni sterili, disinfettanti, dispositivi di protezione (guanti e camici) per eseguire procedure mediche e chirurgiche |    |                                     |                                         |

Nella **farmacia** dell'ospedale in cui Lei lavora sono presenti:

|                                                                                         | Si | No, necessita qualche miglioramento | No, necessita un miglioramento drastico |
|-----------------------------------------------------------------------------------------|----|-------------------------------------|-----------------------------------------|
| 32. Farmacisti qualificati (esperienza sui farmaci pediatrici) ed in numero sufficiente |    |                                     |                                         |
| 33. Adeguata scorta di farmaci per le emergenze e altri farmaci di uso comune           |    |                                     |                                         |
| 34. Adeguata scorta di antibiotici di prima e seconda linea                             |    |                                     |                                         |
| 35. Rapido servizio di distribuzione ai reparti                                         |    |                                     |                                         |

Nella struttura in cui Lei lavora, esistono le seguenti **strutture fisiche**:

|                                                                                                                                   | Si | No, necessita qualche miglioramento | No, necessita un miglioramento drastico |
|-----------------------------------------------------------------------------------------------------------------------------------|----|-------------------------------------|-----------------------------------------|
| 36. Servizi igienici per gli operatori in numero adeguato, puliti, in prossimità servizio in cui si lavora                        |    |                                     |                                         |
| 37. Stanze per gli operatori per svolgere il loro lavoro, in numero adeguato e sufficientemente equipaggiate con quello che serve |    |                                     |                                         |
| 38. Un adeguato numero di computer o altri devices (es tablet) necessari per il lavoro                                            |    |                                     |                                         |
| 39. Un adeguato numero di prese elettriche e corrente sempre disponibile                                                          |    |                                     |                                         |
| 40. Servizio mensa adeguato ad un costo adeguato                                                                                  |    |                                     |                                         |

**Quali sono i Suoi suggerimenti per migliorare gli aspetti di cui sopra? (Aggiungere nel box)**

|  |
|--|
|  |
|--|

### SEZIONE B. ORGANIZZAZIONE DEL LAVORO

In merito all'**organizzazione del personale**, nella struttura/unità in cui Lei lavora:

|                                                                                                                                                                                  | Si | No, necessita qualche miglioramento | No, necessita un miglioramento drastico |
|----------------------------------------------------------------------------------------------------------------------------------------------------------------------------------|----|-------------------------------------|-----------------------------------------|
| 1. Esiste una struttura di leadership (= organigramma) scritto, aggiornato e disponibile a tutto il personale                                                                    |    |                                     |                                         |
| 2. Esistono procedure standard e un piano di azione per assicurare adeguate risorse umane (sistema assunzioni, sviluppo capacità, sviluppo motivazione e ritenzione dello staff) |    |                                     |                                         |
| 3. Tutto il personale ha ricevuto un piano di lavoro chiaro e concordato rispetto al suo ruolo all'interno della struttura                                                       |    |                                     |                                         |
| 4. Esiste un calendario dei turni disponibile a tutto il personale ed un canale comunicativo efficace per raggiungere il personale di turno/reperibile in maniera rapida         |    |                                     |                                         |

Nell'ultimo anno, Lei ha ricevuto una **formazione** (sia tramite corsi o tramite tutoraggio) in merito a:

|                                                                                                                                                   | Si | No | Si, ma non adeguato |
|---------------------------------------------------------------------------------------------------------------------------------------------------|----|----|---------------------|
| 5. Triage in Pronto Soccorso e gestione pratica delle emergenze pediatriche                                                                       |    |    |                     |
| 6. Gestione delle comuni malattie pediatriche (febbre, diarrea, tosse etc)                                                                        |    |    |                     |
| 7. Valutazione, prevenzione e controllo del dolore dei bambini (incluso il dolore procedurale)                                                    |    |    |                     |
| 8. Gestione del bambino ed adolescente con bisogni particolari, es. malattie croniche (diabete), patologia neuro-psichiatrica, maltrattamento     |    |    |                     |
| 9. Utilizzo appropriato dei farmaci e della fluidoterapia nel bambino (diluzioni, dosaggi etc)                                                    |    |    |                     |
| 10. Nutrizione del bambino (incluso allattamento al seno, svezzamento e diete per condizioni particolari)                                         |    |    |                     |
| 11. Comunicazione al bambino ed alla famiglia, inclusi corretti metodi di counselling e di educazione della famiglia alla gestione della malattia |    |    |                     |
| 12. Diritti dei bambini in ospedale e come garantire cure rispettose e pratiche non discriminatorie                                               |    |    |                     |

|                                                                                    |  |  |  |
|------------------------------------------------------------------------------------|--|--|--|
| 13. Aspetti medico legali nelle cure pediatriche (es. consenso informato, privacy) |  |  |  |
|------------------------------------------------------------------------------------|--|--|--|

**Desidera che sia attuato un particolare corso/i di formazione e/o aggiornamento? (specifichi quale/i nel box)**

|  |
|--|
|  |
|--|

Rispetto ai **sistemi raccolta dati**, nella struttura/unità in cui Lei lavora:

|                                                                                                                                                                                                   | Si | No, necessita qualche miglioramento | No, necessita un miglioramento drastico |
|---------------------------------------------------------------------------------------------------------------------------------------------------------------------------------------------------|----|-------------------------------------|-----------------------------------------|
| 14. Nelle cartelle cliniche, i dati relativi alle informazioni demografiche e cliniche e al programma diagnostico-terapeutico del paziente sono riportati in maniera chiara, completa e leggibile |    |                                     |                                         |
| 15. Sono presenti adeguati grafici e fogli di monitoraggio                                                                                                                                        |    |                                     |                                         |
| 16. Esiste un sistema di raccolta dati clinici (registro informatico) facile da consultare, completo e accurato                                                                                   |    |                                     |                                         |

Ai fini di migliorare la **qualità delle cure**, nella struttura/unità in cui Lei lavora:

|                                                                                                                                                                                                                                                                                | Si | No, necessita qualche miglioramento | No, necessita un miglioramento drastico |
|--------------------------------------------------------------------------------------------------------------------------------------------------------------------------------------------------------------------------------------------------------------------------------|----|-------------------------------------|-----------------------------------------|
| 17. C'è una discussione periodica dei casi clinici (almeno 1 volta alla settimana) volta a migliorare la qualità delle cure                                                                                                                                                    |    |                                     |                                         |
| 18. Sono condotti audit efficaci e volti a migliorare la qualità delle cure, per tutti i casi di morte pediatrica e tutti i casi severi che sono stati a rischio morte o di eventi avversi gravi                                                                               |    |                                     |                                         |
| 19. L'andamento degli indicatori chiave di buone pratiche (es. prescrizioni antibiotiche, valutazione e trattamento tempestivo del dolore) è analizzato ad intervalli regolari (es. mensili) e condiviso con tutto il personale coinvolto al fine di migliorare la performance |    |                                     |                                         |
| 20. Pazienti o associazioni di pazienti vengono coinvolti nella discussione della qualità delle cure per le condizioni di pediatria generale e nella definizione di interventi migliorativi                                                                                    |    |                                     |                                         |
| 21. Le decisioni prese per migliorare la qualità delle cure erogate sono strutturate in piani di azioni che identificano il responsabile e le tempistiche e sono condivisi con tutto il personale coinvolto                                                                    |    |                                     |                                         |
| 22. Lei è stato coinvolto in prima persona in attività efficaci nel migliorare la qualità delle cure                                                                                                                                                                           |    |                                     |                                         |

|                                                                                                 | Si | No, necessita qualche miglioramento | No, necessita un miglioramento drastico |
|-------------------------------------------------------------------------------------------------|----|-------------------------------------|-----------------------------------------|
| 23. Ritiene di essere adeguatamente formato su metodi di miglioramento della qualità delle cure |    |                                     |                                         |

Rispetto alle attività di **supervisione/tutoraggio**, nella struttura/unità in cui Lei lavora:

|                                                                                                                                                                                            | Si | No, necessita qualche miglioramento | No, necessita un miglioramento drastico |
|--------------------------------------------------------------------------------------------------------------------------------------------------------------------------------------------|----|-------------------------------------|-----------------------------------------|
| 24. Negli ultimi 3 mesi ha ricevuto formazione sul campo e supervisione da un tutor/supervisore                                                                                            |    |                                     |                                         |
| 25. Nell'ultimo anno, il Suo tutor od un'altra figura adeguata ha effettuato una valutazione costruttiva del suo lavoro almeno una volta, con l'obiettivo di migliorare le sue prestazioni |    |                                     |                                         |

**Quali sono i Suoi suggerimenti per migliorare gli aspetti di cui sopra? (Aggiungere nel box)**



**SEZIONE C. EMERGENZA COVID-19**

|                                                                                                                                                                                                                               | Si | No, necessita qualche miglioramento | No, necessita un miglioramento drastico |
|-------------------------------------------------------------------------------------------------------------------------------------------------------------------------------------------------------------------------------|----|-------------------------------------|-----------------------------------------|
| 1. Esistono delle procedure scritte, chiare e complete, sui percorsi (es Triage e successivi reparti) per tipologia di paziente?                                                                                              |    |                                     |                                         |
| 2. I pazienti con infezione sospetta od accertata seguono un percorso dedicato dal momento dell'ingresso nel comprensorio dell'Ospedale, che riduca il possibile rischio di infezione per gli operatori o per altri pazienti? |    |                                     |                                         |
| 3. La routine di reparto è stata riorganizzata al meglio per ridurre per quanto possibile il rischio di trasmissione di COVID-19?                                                                                             |    |                                     |                                         |
| 4. Nel suo reparto sono sempre disponibili adeguati DPI in numero sufficiente da poter utilizzare durante le visite?                                                                                                          |    |                                     |                                         |
| 5. Ha avuto sempre facile accesso a postazioni per lavaggio mani o soluzioni disinfettati adeguate?                                                                                                                           |    |                                     |                                         |
| 6. In questo momento tutti gli operatori sanitari sintomatici o contatti stretti dei casi accertati/sospetti sono sottoposti a tampone nasofaringeo per COVID-19?                                                             |    |                                     |                                         |
| 7. In questo momento tutti i casi ricoverati sono sottoposti a tampone nasofaringeo per COVID-19?                                                                                                                             |    |                                     |                                         |
| 8. In questo momento tutti gli accompagnatori dei casi ricoverati sono sottoposti a tampone nasofaringeo per COVID-19?                                                                                                        |    |                                     |                                         |
| 9. Esiste un protocollo chiaro e completo per la gestione clinica dei casi "sospetti" o "accertati" di COVID-19?                                                                                                              |    |                                     |                                         |
| 10. Ritiene che in le direttive del Suo Ospedale/Reparto siano in generale state adeguate, tempestive e chiare?                                                                                                               |    |                                     |                                         |
| 11. Ritiene di aver avuto una informazione e formazione adeguata?                                                                                                                                                             |    |                                     |                                         |

Nell'ultimo mese quanto tempo ha dedicato ad attività riorganizzative o gestionali relative al COVID-19 (es riunioni etc) rispetto al totale del suo tempo?

- Circa il 25%
- Tra 25 e 50%
- Oltre il 50%

**Quali sono i Suoi suggerimenti per migliorare la qualità delle cure in questa fase di emergenza COVID-19? (Aggiungere nel box)**

**Che suggerimenti ci da per migliorare questa parte del questionario?**

#### SEZIONE D. SODDISFAZIONE GENERALE

1. Nel complesso, quanto è **soddisfatto** del Suo lavoro da 1 a 10?

**( 0= per nulla soddisfatto, 10 =del tutto soddisfatto )**

0 1 2 3 4 5 6 7 8 9 10

2. **Vorrebbe cambiare** luogo di lavoro?

- No
- Sì

**Quali sono i Suoi suggerimenti per aumentare la soddisfazione degli operatori rispetto alla qualità ed organizzazione dei servizi? (Aggiungere nel box)**

#### INFORMAZIONI DEMOGRAFICHE

**Qual è la Sua qualifica professionale?**

- Pediatra
- Medico Specializzando in Pediatria
- Infermiere generico
- Infermiere pediatrico
- Medico Specializzando in altra specialità
- Medico in Formazione di Medicina Generale

**Da quanti anni lavora nell'ambito pediatrico?**

- Meno di 1
- Da 1 a 5

- Da 6 a 10
- Più di 10

**In quale ospedale lavora?**

- Alessandria
- Bari
- Catania
- Firenze
- Latina
- Mantova
- Padova
- Palermo
- Ravenna
- Treviso
- Trieste
- Udine

**Da quanti anni lavora in questo ospedale?**

- Meno di 1
- Da 1 a 5
- Da 6 a 10
- Più di 10

**Qual è il Suo sesso?**

- Maschio
- Femmine
- Altro

**IN MERITO AL QUESTIONARIO...**

Ritiene che questo questionario possa essere utile a catturare gli aspetti importanti per gli operatori?

- Sì
- No

Ritiene che il questionario sia esaustivo?

- Sì
- No

Quali aspetti sono più importanti per Lei?

- Tutto
- Sezione A
- Sezione B
- Solo alcuni item di ogni sezione

Rispetto alla lunghezza del questionario:

- E' adeguata
- E' troppo lungo

- E' troppo corto

Che modifiche suggerisce

**Grazie ancora per averci donato il suo tempo prezioso!**
